# Supplementary material
Source: PubMed Central journal article supplement (PMC4710564)
Supplement: NIHMS741883-supplement-Supporting_Information.pdf [file NIHMS741883-supplement-Supporting_Information.pdf]

# Supporting Information figure 1

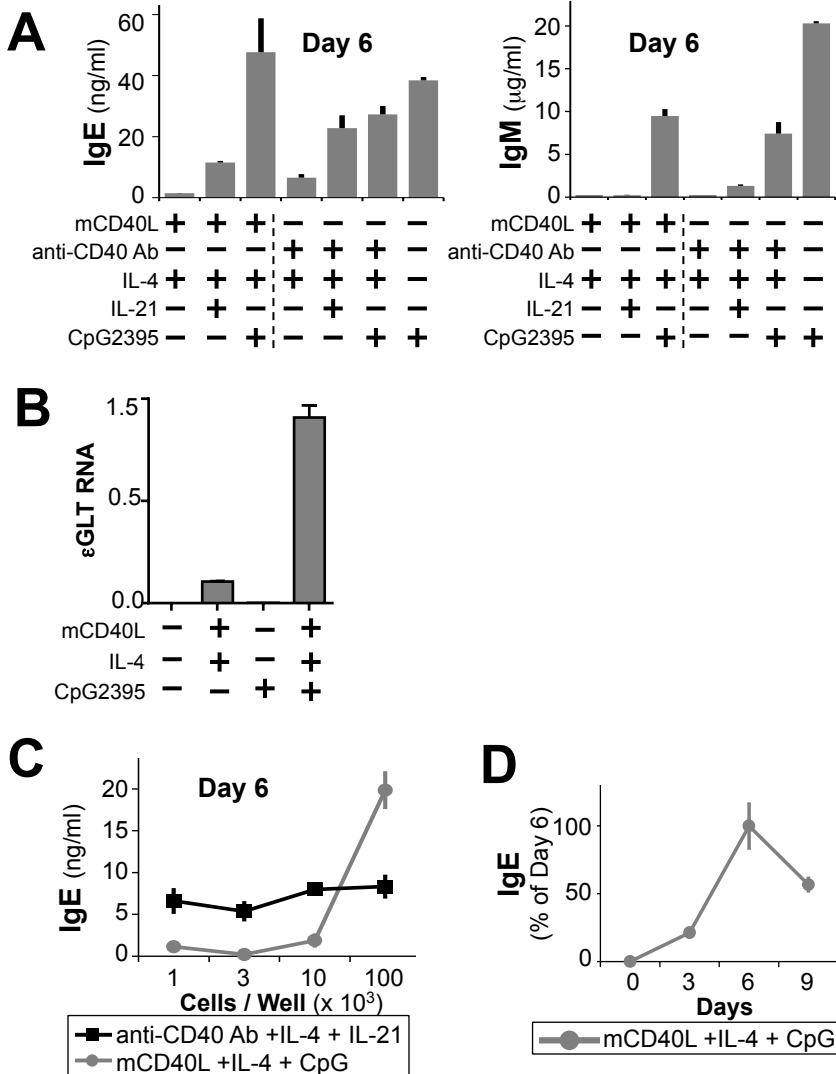

**Supporting Information figure 1. Human B cell IgE production in vitro is preferentially promoted using an IgE-inducing cocktail. (A)** Purified human B cells ( $1 \times 10^5$  cells/well) were plated in 96 well plates and treated with different IgE-inducing cocktails for 6 days. Culture supernatant IgE or IgM antibody levels were measured using ELISA assay. **(B)** Purified human B cells ( $1 \times 10^5$  cells/well) were treated with different IgE-inducing cocktails and cell lysates were collected at day 1. RNA levels of  $\epsilon$ GLT were measured using RT-qPCR and normalized to 18S rRNA. **(C)** Different numbers of B cells were treated with two different IgE-inducing cocktails (mCD40L+IL4+CpG ODN2395 and aCD40+IL4+IL21) for 6 days and IgE levels were measured using ELISA assay. **(D)** B cells were treated with an IgE-inducing cocktail containing mCD40L, IL4, and CpG ODN2395 for different periods of time, and IgE levels were measured using ELISA assay. Results shown are mean  $\pm$  SEM for  $n=3$  replicates per condition.

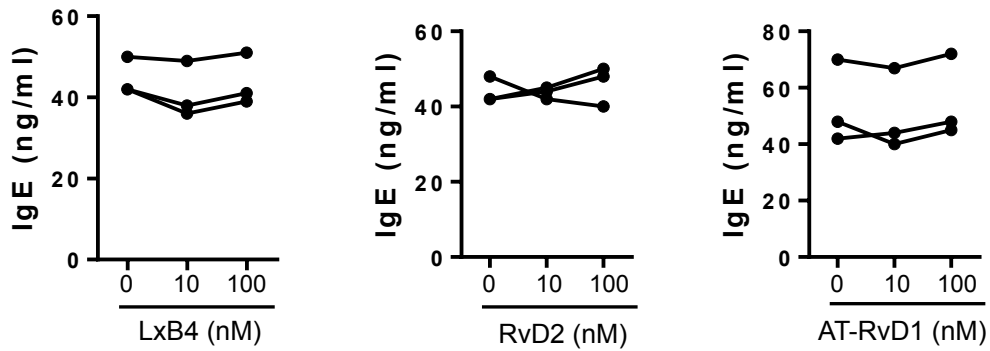

**Supporting Information figure 2. LxB4, RvD2 and AT-RvD1 do not affect human B cell IgE production**  
Three different SPMs, lipoxin B4 (LxB4), resolvin D2 (RvD2) and aspirin-triggered resolvin D1 (AT-RvD1), were tested on B cells from 3 different donors and culture supernatant IgE levels were measured by ELISA assay.
